# Supplementary material for: The Predicted Key Molecules, Functions, and Pathways That Bridge Mild Cognitive Impairment (MCI) and Alzheimer's Disease (AD)
Source: Front Neurol. 2020 Apr 3;11:233. doi: 10.3389/fneur.2020.00233 (PMC7145962; doi:10.3389/fneur.2020.00233)
Supplement: Supplementary file 1 [file Table_1.XLSX]

## Sheet: Table S1
Table S1 DEG1 between MCI and control
row.names(tT)	logFC	P.Value	regulate
LOC648622	-0.758708	9.31e-09	down
LOC648000	-0.756939	4.87e-12	down
RPL31	-0.747744	7.7e-14	down
LOC650276	-0.743184	3.5e-07	down
RPL26	-0.726902	3.61e-10	down
TOMM7	-0.716253	9.78e-09	down
RPL17	-0.703709	9.27e-09	down
COX7C	-0.652472	1.05e-06	down
NDUFA1	-0.64616	5.13e-06	down
RPS17	-0.636545	1.99e-08	down
S100A8	-0.623511	6.65e-09	down
SNRPG	-0.622392	1.82e-07	down
RPS27	-0.617933	2.8e-09	down
LOC646200	-0.6005	1.23e-07	down
CCDC72	-0.594476	2.39e-08	down
NDUFB3	-0.593492	3.49e-09	down
HINT1	-0.591502	2.32e-06	down
NDUFA4	-0.587106	1.49e-08	down
LOC653658	-0.579014	9.61e-17	down
RPS3A	-0.560965	6.79e-10	down
NDUFS5	-0.548947	9.81e-08	down
RPL39	-0.54227	9.31e-07	down
TXN	-0.537865	1.19e-07	down
COX7A2	-0.535643	2.56e-06	down
LOC654194	-0.53508	5.96e-11	down
UQCRQ	-0.530617	1.21e-06	down
RPL23	-0.520723	4.05e-11	down
LOC653773	-0.520265	3.59e-10	down
LSM3	-0.518495	3.38e-07	down
LOC442454	-0.518316	2.5e-08	down
ANXA1	-0.515765	2.12e-05	down
KLRB1	-0.513265	4.48e-06	down
RPL21	-0.504401	8.34e-12	down
ATP5O	-0.502917	3.34e-07	down
LOC731640	-0.499851	4.27e-10	down
LOC388621	-0.49867	5.5e-11	down
LOC643284	-0.49663	2.22e-06	down
LOC388532	-0.494918	1.04e-07	down
CLC	-0.485332	0.000343218	down
EIF3E	-0.480131	3.27e-06	down
ENY2	-0.476486	3.77e-07	down
ATP6V1G1	-0.473299	2.68e-07	down
S100A12	-0.472219	2.72e-10	down
RPS25	-0.467384	8.29e-06	down
RPS24	-0.46678	9.7e-10	down
COMMD6	-0.461174	1.53e-08	down
PFDN5	-0.460288	3.55e-07	down
CMTM2	-0.460252	5.09e-06	down
LOC647361	-0.453157	0.000144005	down
CD52	-0.451427	0.000103516	down
LOC651436	-0.44713	6.78e-06	down
C14ORF156	-0.445919	9.27e-06	down
S100P	-0.44556	1.96e-05	down
LY96	-0.441194	2.05e-05	down
RPS27L	-0.437796	0.000238429	down
LOC642250	-0.435838	8.67e-06	down
TBCA	-0.434286	1.8e-05	down
LOC441246	-0.433507	0.000286787	down
NDUFB2	-0.431497	1.47e-05	down
DNAJA1	-0.431409	8.42e-06	down
LOC285900	-0.429612	5.23e-08	down
LOC650518	-0.427968	1.11e-05	down
RPL36AL	-0.427011	1.39e-06	down
LOC401206	-0.426034	4.14e-06	down
ATP5J	-0.425256	2.5e-05	down
CIP29	-0.424721	7.24e-05	down
TMCO1	-0.423203	2.72e-06	down
LOC646483	-0.419568	0.00610203	down
LOC389787	-0.418896	1.03e-08	down
FCER1A	-0.414999	1.73e-05	down
LOC646766	-0.413737	1.11e-05	down
RPL35	-0.407765	0.000254943	down
LOC391656	-0.40588	5.26e-06	down
LOC642989	-0.405698	2.25e-10	down
PSMA4	-0.403874	1.08e-06	down
DBI	-0.399801	1.98e-06	down
TINP1	-0.39635	2.21e-06	down
GZMA	-0.393423	0.000145035	down
PSMA6	-0.392396	2.11e-05	down
TXNDC17	-0.392173	1.07e-05	down
DPM1	-0.390399	1.9e-06	down
GMFG	-0.389561	9.32e-07	down
LOC731365	-0.387849	0.000543757	down
RPS27A	-0.379972	5.44e-07	down
MAP2K1IP1	-0.378978	3.78e-06	down
NDUFS4	-0.378942	0.000107387	down
SS18L2	-0.378069	9.86e-05	down
SNHG5	-0.377846	5.54e-05	down
TAX1BP1	-0.375327	0.000495434	down
LOC651202	-0.375049	3.72e-07	down
LOC647340	-0.37428	2.12e-06	down
LOC440737	-0.370744	9.16e-06	down
ATP5EP2	-0.369416	0.000719548	down
LOC402057	-0.363627	6.04e-07	down
RWDD1	-0.363298	0.00348986	down
RPL24	-0.362982	2.34e-05	down
CAPZA2	-0.362485	0.000313842	down
LOC729466	-0.357115	0.000699035	down
RPL27	-0.356594	0.00217364	down
LOC134997	-0.354842	1.19e-08	down
AP1S2	-0.354444	0.000414419	down
LOC644863	-0.353906	0.000454041	down
RPL5	-0.351229	7.41e-05	down
ERH	-0.350511	3.53e-05	down
VPS29	-0.349848	0.00010635	down
ARPC3	-0.348658	0.000360002	down
RBX1	-0.347636	4.18e-06	down
RPL30	-0.347495	0.000547103	down
COX17	-0.346315	0.000356807	down
RPS15A	-0.345945	0.000195336	down
ATP5C1	-0.342518	4.48e-06	down
TPT1	-0.342059	0.00698531	down
MDH1	-0.341777	0.000283584	down
RPL11	-0.340653	1.85e-05	down
MRPL51	-0.33981	7.37e-05	down
ARGLU1	-0.338711	0.000676808	down
COMMD3	-0.337362	0.000412868	down
PSMB1	-0.335345	0.000214873	down
SHFM1	-0.331232	0.000370754	down
COX7B	-0.330918	6.51e-06	down
GLRX	-0.330866	9.12e-10	down
LOC341457	-0.330538	0.0013868	down
MYL6	-0.329238	0.000968955	down
COPS5	-0.328145	0.000801318	down
LOC651064	-0.327767	3.36e-05	down
RPL35A	-0.326274	0.00266863	down
SRP14P1	-0.323986	1.75e-07	down
SRP14	-0.322492	0.00201052	down
RPA3	-0.322043	6.28e-06	down
C14ORF112	-0.321141	0.000133898	down
LOC653505	-0.320492	0.000174421	down
DEK	-0.317763	2.55e-06	down
REEP5	-0.316895	0.000124646	down
LSM1	-0.316858	0.000232148	down
RGS18	-0.315439	0.00135347	down
SNRPD2	-0.315275	3.68e-13	down
RPL7	-0.314901	7.72e-06	down
MRLC2	-0.313816	0.00138208	down
ASNSD1	-0.312932	0.000165248	down
HSPE1	-0.312808	0.000594316	down
LOC388720	-0.310593	0.00125777	down
ATP5F1	-0.310273	4.74e-05	down
ATP6V1D	-0.309127	0.000664207	down
PSMC2	-0.307193	0.00111554	down
CD3D	-0.306986	0.00038959	down
LDHB	-0.306018	3.01e-09	down
H2AFZ	-0.305525	0.000931522	down
RPS20	-0.305072	1.97e-06	down
SEC11A	-0.304262	0.0059171	down
VBP1	-0.30353	0.000497297	down
HSP90AA1	-0.30335	4.84e-05	down
LOC158345	-0.302979	0.000216618	down
LOC402251	-0.302188	0.00043241	down
CALM2	-0.301902	0.000105891	down
METAP2	-0.301573	0.000145244	down
SF3B14	-0.300448	0.000107347	down
RPS18	-0.296067	0.000697569	down
CHMP5	-0.291293	3.56e-05	down
RPL9	-0.289711	4.47e-05	down
GTF2B	-0.28872	0.000545308	down
ZMAT2	-0.288048	0.0160949	down
ARL6IP5	-0.286466	5.83e-05	down
CEBPZ	-0.285731	0.000137478	down
PPA1	-0.285341	0.000472963	down
LOC649548	-0.284482	0.000378528	down
MRPS22	-0.283869	0.00159961	down
TMEM126A	-0.283694	0.00103787	down
MRPL33	-0.283077	0.000370567	down
SOD1	-0.280997	0.00022988	down
CCDC53	-0.280085	0.00115163	down
TNFSF10	-0.279755	0.00661003	down
TMEM123	-0.279726	0.00408269	down
PCNP	-0.279677	0.00408903	down
UQCRH	-0.279139	0.000352249	down
MRPL22	-0.278404	0.000768622	down
ANAPC13	-0.276235	0.000237847	down
RPS29	-0.276191	0.00116233	down
CASP1	-0.275547	0.0357737	down
LEPROTL1	-0.274818	0.000617319	down
LOC401397	-0.274416	0.00061548	down
RPL4	-0.274347	0.00334685	down
LOC653226	-0.274209	0.000353654	down
PCMT1	-0.272218	0.00534668	down
B2M	-0.271623	9.44e-06	down
POLR3GL	-0.271446	0.0029408	down
MRPS18C	-0.27133	5.14e-07	down
TMBIM4	-0.271169	0.00391807	down
TMEM126B	-0.268987	0.000280397	down
SSB	-0.268925	0.00497701	down
SLC35A1	-0.267677	0.00158474	down
CWC15	-0.267466	0.000375724	down
C1ORF41	-0.266782	0.00112377	down
ATP6V1E1	-0.266565	0.00467841	down
C16ORF61	-0.265917	0.00384499	down
YPEL5	-0.265897	0.00412234	down
PCMTD1	-0.264667	6.04e-06	down
Selenoprotein 15	-0.263805	0.000333312	down
HS.508682	0.264864	0.00796398	up
SLC4A1	0.266258	0.0322385	up
HBM	0.276229	0.0141321	up
LOC401357	0.289303	0.00023149	up
ATHL1	0.306714	0.00239747	up
LOC388588	0.319435	0.0191023	up
LOC643031	0.344232	8.79e-05	up
LOC100008589	0.544093	1.21e-05	up

## Sheet: Table S2
Table S2 DEG2 between AD and control
row.names(tT)	logFC(control vs AD)	P.Value	regulate
HLA-A29.1	-0.883403	1.36e-05	up
LOC100008589	-0.740768	2.98e-11	up
HS.171171	-0.43743	1.55e-05	up
ATHL1	-0.422617	1.5e-06	up
C5ORF41	-0.400907	7.62e-06	up
LOC388588	-0.394719	0.00301694	up
RYBP	-0.391148	0.000321162	up
ITGAM	-0.390146	1.9e-06	up
PADI4	-0.390143	8.09e-06	up
AKR1D1	-0.389542	0.036486	up
MBD6	-0.389329	1.36e-05	up
MMP9	-0.387517	0.000507167	up
DYSF	-0.385251	0.000106092	up
PRIC285	-0.383871	6.27e-05	up
LOC643031	-0.381523	1.32e-06	up
TYK2	-0.380201	2.05e-05	up
ADAM8	-0.374515	8.77e-05	up
OSCAR	-0.373732	0.000230782	up
APBB1IP	-0.37114	0.000770381	up
HK3	-0.369205	0.000158718	up
LOC401357	-0.368984	5.25e-07	up
HS.508682	-0.367145	4.44e-05	up
PGLYRP1	-0.364364	0.000194564	up
CRISPLD2	-0.364162	0.000108284	up
LOC730994	-0.363161	5.92e-05	up
C10ORF54	-0.360903	3.83e-05	up
RNF24	-0.359824	0.000773958	up
PCBP2	-0.359821	0.0373764	up
ACTN1	-0.358824	0.000162933	up
NBEAL2	-0.358505	7.89e-08	up
HS.131087	-0.34871	1.27e-05	up
HLA-H	-0.345606	1.75e-06	up
EDG4	-0.343297	4.6e-07	up
CFLAR	-0.341674	1.3e-05	up
SORL1	-0.341014	0.000104744	up
CEBPB	-0.339277	0.000502828	up
KIAA0913	-0.336963	0.000122287	up
SRRM2	-0.336183	0.000383016	up
DUSP1	-0.335879	0.000464255	up
ANPEP	-0.33541	0.00112295	up
STAT2	-0.33249	0.000975974	up
GRN	-0.331911	0.000226158	up
C16ORF7	-0.331801	6.02e-05	up
MX1	-0.33052	0.00210603	up
HCG27	-0.330408	4.2e-05	up
C17ORF62	-0.329026	0.00223564	up
IGF2R	-0.325934	9.28e-05	up
C7ORF43	-0.324446	0.000204791	up
GNS	-0.323977	4.69e-05	up
FPR1	-0.323818	0.000248347	up
C14ORF159	-0.323509	0.000327229	up
ARID3A	-0.323498	0.00091521	up
CSF3R	-0.322782	0.000104962	up
STAT6	-0.322068	0.000309465	up
ABTB1	-0.321745	0.000102454	up
PFKFB4	-0.32152	0.000253667	up
ICAM3	-0.321299	0.000108209	up
RHOQ	-0.320868	0.0381548	up
XPO6	-0.319403	0.000167363	up
ITGAL	-0.318414	0.000405874	up
SHKBP1	-0.316797	0.00011747	up
FGD3	-0.316065	3.43e-05	up
SCO2	-0.316023	0.000303532	up
LOC653158	-0.315843	0.000723987	up
MYH9	-0.315825	0.000994078	up
LPP	-0.314803	1.93e-05	up
HS.193767	-0.314417	0.000209507	up
MAST3	-0.314301	0.00022177	up
NDE1	-0.313903	0.000995568	up
LOC641710	-0.312047	3.95e-06	up
C1ORF24	-0.311215	0.00405394	up
C9ORF164	-0.308749	0.000739068	up
CEBPD	-0.307907	0.00020097	up
MICAL1	-0.307318	9.53e-05	up
PACSIN2	-0.306951	0.0184816	up
TMEM8	-0.306637	0.000298423	up
ATP6AP1	-0.306215	4.58e-05	up
ZYG11B	-0.305769	0.00282721	up
LOC196752	-0.304357	0.000131265	up
TBC1D10C	-0.30429	0.00100444	up
FLOT2	-0.30411	0.000340224	up
LOC729021	-0.303815	6.12e-06	up
FES	-0.30367	1.4e-05	up
ATG16L2	-0.303617	1.91e-05	up
POLR2A	-0.303241	0.000556859	up
SELPLG	-0.302959	1.18e-05	up
SELL	-0.302592	0.0010677	up
IL8RB	-0.302582	0.00531601	up
LYN	-0.302413	0.00121435	up
PLCB2	-0.301964	0.000246854	up
HSPA1A	-0.301838	0.00056176	up
BEST1	-0.301798	0.000147244	up
CLCN7	-0.301113	0.000316999	up
RXRA	-0.300608	0.00214768	up
FOLR3	-0.30031	0.0036963	up
FPR2	-0.299889	0.00107681	up
SLC12A9	-0.299671	0.00091805	up
SFRS17A	-0.299609	0.000216734	up
CD93	-0.299594	0.00113022	up
DGKQ	-0.299473	0.000195555	up
VCL	-0.299332	0.0104306	up
TBXAS1	-0.299145	0.000388136	up
PILRA	-0.298405	0.00102334	up
LOC338758	-0.298402	1.18e-05	up
STXBP2	-0.297941	0.000528146	up
ARHGAP4	-0.297564	0.000326382	up
PPM1F	-0.297475	0.000203737	up
MYO1G	-0.297361	0.000345167	up
HS.184721	-0.297024	0.00183773	up
SLC7A7	-0.296988	0.00266417	up
UBA7	-0.296476	3.82e-05	up
EFHD2	-0.296343	0.000456003	up
MNT	-0.295278	0.00275662	up
BRI3	-0.29525	0.00274635	up
ARHGAP9	-0.294205	0.000142658	up
PITPNM1	-0.293789	0.00139151	up
RAB40C	-0.292572	0.00069722	up
VCAN	-0.292392	1.34e-06	up
NXF1	-0.292357	0.000526177	up
DPEP2	-0.291936	0.00317612	up
LOC399744	-0.291808	0.00137347	up
PSCD4	-0.291784	0.00281349	up
TIMP1	-0.291689	0.000291202	up
HSPA1B	-0.29166	0.00080428	up
LOC642103	-0.291551	0.000167365	up
SMAP2	-0.291276	0.00283508	up
CCDC130	-0.291219	0.00244458	up
SNX27	-0.291143	0.000683458	up
LOC728417	-0.291091	2.22e-06	up
CD14	-0.290964	0.000452981	up
TNFRSF1A	-0.290738	0.00520161	up
MGC10997	-0.290171	0.0289811	up
SOLH	-0.289349	0.000457043	up
SLC9A1	-0.288584	0.000635917	up
TKT	-0.288512	0.000522127	up
PIK3CD	-0.288407	0.00080738	up
HCLS1	-0.288295	0.000871765	up
CORO7	-0.288139	0.000894165	up
BSG	-0.287863	0.012611	up
ITGA5	-0.287846	0.000312677	up
PGD	-0.287655	0.00355281	up
JUND	-0.287563	0.00139652	up
SEMA4A	-0.287337	0.00158378	up
KIAA1949	-0.286888	0.00290875	up
SLC16A3	-0.286101	0.000633121	up
CCND3	-0.286075	0.000743704	up
HS.549989	-0.286028	0.000962719	up
MYO1F	-0.285986	0.000444999	up
C1ORF218	-0.285829	0.00144206	up
WAS	-0.284855	0.00111754	up
CUTL1	-0.284709	0.000405399	up
SH3BGRL3	-0.284626	0.00491092	up
LMF2	-0.283837	0.00186826	up
NCSTN	-0.283727	0.0025349	up
TLN1	-0.283409	0.000103744	up
TAP1	-0.283373	0.00184216	up
FAM46A	-0.283262	0.00314375	up
TRIM25	-0.282982	0.00128087	up
ELF4	-0.282619	0.000140221	up
PSD4	-0.282094	0.000209313	up
SLC44A2	-0.281668	0.000119737	up
PHKA2	-0.281667	0.00272596	up
LASP1	-0.281491	0.00927444	up
IQSEC1	-0.28123	0.00301109	up
SLC15A4	-0.281132	0.000845653	up
IRF9	-0.281056	0.000424764	up
NPEPL1	-0.280919	2.02e-05	up
SEMA4D	-0.280628	0.00226777	up
EPN1	-0.280614	0.00315922	up
DENND3	-0.280534	0.000266726	up
FAM39E	-0.280462	0.000845479	up
CFP	-0.280234	0.00235444	up
LOC728653	-0.28	0.000386097	up
CECR6	-0.279652	0.000789162	up
FAM53C	-0.279272	0.000239118	up
CARD8	-0.279007	0.000368181	up
CST7	-0.278914	0.00138134	up
AXUD1	-0.278761	0.00260273	up
SBF1	-0.278237	0.000439908	up
CUEDC1	-0.278048	0.000236395	up
TPP1	-0.27794	0.00180916	up
HELZ	-0.277664	0.000657044	up
SLC25A37	-0.277248	0.0151486	up
CAPN1	-0.277144	0.017084	up
SEC61A1	-0.276923	0.00111535	up
C5AR1	-0.275776	0.00299875	up
ARHGAP1	-0.275672	0.00241299	up
PLOD1	-0.27561	8.43e-05	up
CTSD	-0.275571	0.0051187	up
ITGB7	-0.275379	0.00253114	up
ACTN4	-0.275016	0.00110781	up
HSPA6	-0.27492	0.00355124	up
TSEN34	-0.274822	0.00475355	up
KIAA1324	-0.27477	0.00247297	up
WDR6	-0.274338	0.00340751	up
SNRP70	-0.273324	0.0305113	up
SSH2	-0.272915	0.000877937	up
CSF1R	-0.272893	0.000573837	up
NUCB1	-0.272709	0.00219369	up
EP300	-0.272102	0.00397383	up
PNPLA6	-0.272062	0.00370669	up
SGSM2	-0.272008	0.000938571	up
FCN1	-0.271928	0.000941693	up
CST3	-0.271892	0.00135997	up
MAP3K11	-0.271828	0.000966388	up
FCGRT	-0.271796	0.00127601	up
SLC45A4	-0.271276	0.00427595	up
PI3	-0.271096	0.0106468	up
EIF2AK2	-0.27086	0.00161637	up
MKNK2	-0.27028	0.000655654	up
TSPAN32	-0.270268	0.00101418	up
HS.443185	-0.269951	0.00249058	up
LOC284757	-0.269749	0.000598742	up
C1ORF162	-0.269226	0.000244486	up
NOTCH1	-0.269017	0.000971223	up
LOC441268	-0.268999	0.000852677	up
LRCH4	-0.268791	3.41e-05	up
MSN	-0.268555	0.00950135	up
RHOG	-0.268502	0.000772707	up
TUBA1B	-0.268302	0.013162	up
MFSD10	-0.268094	0.00131792	up
TRIM21	-0.267777	0.00144382	up
TLR5	-0.267701	0.000385788	up
PQLC1	-0.267632	0.0026507	up
SNTB2	-0.267459	0.000327792	up
LILRB3	-0.267104	9.35e-05	up
CKAP4	-0.266907	0.00179909	up
PPM1M	-0.266778	0.00196365	up
TUBA1C	-0.266609	0.0162908	up
CTSS	-0.266349	0.000242465	up
ZNF324	-0.265979	0.00658024	up
ZNF787	-0.265778	0.0066823	up
ZNF148	-0.265643	0.00788586	up
ITPK1	-0.265573	0.000349758	up
IFNGR2	-0.265437	0.00514824	up
INTS3	-0.265427	0.00275489	up
HLA-B	-0.265379	0.00258527	up
MTCH1	-0.265233	0.00504329	up
FLOT1	-0.265159	0.00188636	up
IFI44L	-0.264667	0.0143843	up
CCNI	-0.264457	0.00541829	up
ITGB2	-0.264406	0.000104749	up
NFKBIA	-0.263887	0.000715418	up
TNFRSF14	-0.263542	0.00176082	up
INPPL1	-0.263246	0.00168591	up
KLHDC8B	-0.263128	0.000592281	up
FLJ42957	-0.263083	0.000583937	up
LOC389787	0.264713	0.000177663	down
LOC642250	0.272996	0.00230033	down
FCER1A	0.273509	0.00169176	down
RPL7	0.274823	3.02e-05	down
LOC134997	0.280963	1.56e-06	down
TBCA	0.283432	0.00153561	down
ATP5J	0.28594	0.00162172	down
DBI	0.286505	0.000149725	down
HINT1	0.288549	0.0131962	down
RPL11	0.290381	8.45e-05	down
ATP5EP2	0.293136	0.00292075	down
MRPL51	0.295835	0.000137397	down
PSMA4	0.29922	6.52e-05	down
CIP29	0.300632	0.00151425	down
ANXA1	0.301555	0.00749767	down
CMTM2	0.303245	0.000960357	down
UQCRQ	0.303747	0.00234855	down
SNRPD2	0.31037	4.44e-14	down
NDUFA4	0.320116	0.000953309	down
PPBP	0.322811	7.49e-07	down
C14ORF156	0.324079	0.000260334	down
EIF3E	0.330487	0.000629212	down
LDHB	0.331023	1.94e-10	down
DNAJA1	0.337009	0.000115585	down
COMMD6	0.3414	2.9e-06	down
RPS27A	0.34551	1.3e-06	down
LOC285900	0.352845	1.18e-06	down
CLC	0.355399	0.00455851	down
ENY2	0.359932	1.78e-05	down
LOC642989	0.360614	4.33e-09	down
LOC651202	0.360788	3.25e-08	down
KLRB1	0.361731	0.000461932	down
RPL39	0.385567	0.000188418	down
ATP5O	0.389129	1.71e-05	down
PFDN5	0.389666	3.18e-06	down
TXN	0.390184	1.76e-05	down
LOC401206	0.39463	4.98e-06	down
LSM3	0.398643	9.59e-06	down
RPS25	0.399689	4.02e-05	down
LOC388532	0.411764	2.11e-06	down
S100A8	0.419082	1.31e-05	down
RPS24	0.42024	9.92e-10	down
SNRPG	0.424308	8.85e-05	down
RPS27	0.424915	1.23e-05	down
LOC653773	0.426143	3.53e-08	down
COX7C	0.427531	0.00049192	down
RPS17	0.437418	3.14e-05	down
NDUFB3	0.447453	5.52e-07	down
RPL36AL	0.449939	5.49e-08	down
LOC731640	0.452663	1.6e-09	down
RPS3A	0.456735	2.37e-07	down
CCDC72	0.473196	5.63e-07	down
LOC388621	0.500999	1.64e-12	down
LOC648622	0.513067	2.85e-05	down
RPL17	0.521621	3.42e-06	down
RPL23	0.522986	3.5e-13	down
NDUFS5	0.526657	1.2e-08	down
LOC442454	0.543374	3.09e-11	down
RPL21	0.551864	6.1e-16	down
LOC650276	0.562389	3.32e-05	down
LOC654194	0.563298	1.15e-14	down
LOC646200	0.564174	5.41e-08	down
NDUFA1	0.586336	3.73e-06	down
TOMM7	0.590604	2.61e-07	down
RPL31	0.629966	5.28e-12	down
LOC653658	0.686589	2.74e-22	down
RPL26	0.688602	3.86e-11	down
LOC648000	0.71089	2.3e-12	down

## Sheet: Table S3
Table S3 DEG3 between MCI and AD
row.names(tT)	logFC	P.Value	regulate
HLA-A29.1	-0.542176	0.0103279	down
C21ORF24	-0.462937	0.0494724	down
RGS18	-0.351776	0.000374992	down
FKSG30	-0.347854	0.036272	down
RHOQ	-0.342742	0.0381779	down
IL18RAP	-0.341474	0.000380233	down
TMEM123	-0.336258	0.000544547	down
CD55	-0.333776	0.0043393	down
S100P	-0.331799	0.00016132	down
SH3BGRL	-0.32916	0.0121674	down
ARGLU1	-0.327846	0.000709584	down
CAPZA2	-0.324549	0.000839687	down
LOC652624	-0.322289	0.0234387	down
AP1S2	-0.321233	0.000800086	down
IFNGR1	-0.319202	0.00126028	down
CD52	-0.31596	0.00428333	down
COX7A2	-0.313873	0.00211649	down
LY96	-0.313108	0.000595583	down
HS.407903	-0.311085	1.2e-05	down
PROK2	-0.31083	0.00351757	down
PCNP	-0.305941	0.00126428	down
TRIM22	-0.30561	0.00257275	down
SUZ12	-0.305473	0.00511597	down
HINT1	-0.302953	0.00841884	down
LOC402694	-0.302001	0.000646081	down
GCA	-0.29997	0.000470116	down
LOC387820	-0.297254	0.0447602	down
C13ORF27	-0.297041	0.0280447	down
OXR1	-0.29593	0.00137966	down
EFR3A	-0.295823	0.000741311	down
AMY1C	-0.294798	0.0436047	down
SEMA3E	-0.294457	0.0465262	down
RPLP0	-0.293871	0.0239896	down
FKBP5	-0.291233	3.76e-05	down
KIAA1600	-0.290256	0.000400356	down
TMED5	-0.289837	0.000152502	down
HS.413494	-0.286438	0.00206279	down
TRAM1	-0.285886	0.000667798	down
PELI1	-0.284612	0.00220317	down
C5ORF41	-0.283756	0.0034913	down
FOLR3	-0.283327	0.0106155	down
RAB10	-0.282652	0.000780249	down
TMEM49	-0.28155	0.00708791	down
SSR1	-0.279592	0.00476596	down
ZMPSTE24	-0.279252	0.00175899	down
NUP214	-0.278978	0.00168247	down
LOC651436	-0.276568	0.00717575	down
HS.127310	-0.27607	0.00242699	down
LOC441246	-0.275921	0.0155794	down
LDHA	-0.27504	0.0284509	down
C20ORF24	-0.27441	0.00140069	down
CLIC1	-0.274307	0.00221858	down
ZNF69	-0.273156	0.0476431	down
MMP9	-0.272588	0.0265278	down
TMEM183A	-0.271779	0.0491702	down
LOC643284	-0.271747	0.00600435	down
C19ORF59	-0.271648	0.00307028	down
TPT1	-0.271311	0.0267117	down
GOLGA8B	-0.270955	0.0290332	down
DUSP1	-0.270356	0.00895298	down
SMG1	-0.269869	0.00223943	down
BRI3	-0.269687	0.0118814	down
CPD	-0.269337	0.000514301	down
STX11	-0.269243	0.00513339	down
BTAF1	-0.268879	0.000945173	down
MYD88	-0.268185	0.016404	down
LOC391656	-0.267803	0.00249838	down
LOC647361	-0.267579	0.0202581	down
YPEL5	-0.267184	0.00268468	down
NDUFA4	-0.26699	0.00278888	down
ATP6V1A	-0.266865	0.00320112	down
CPNE3	-0.266285	0.00383302	down
BAZ2B	-0.265947	0.000555791	down
RPL35	-0.265132	0.0129683	down
PTEN	-0.265124	0.00461057	down
IFNGR2	-0.264289	0.00951469	down
LOC649049	-0.264198	0.00531866	down
HS.570988	-0.264196	0.000545071	down
CBFB	-0.26364	0.00618644	down
SFT2D1	-0.263592	0.00212548	down
CHCHD2	-0.263533	0.00424305	down
HCG27	-0.263305	0.00216048	down
HLA-DRB5	0.38607	0.0456997	up

## Sheet: Table S4
Table S4 bridge_GO(functions)
structural constituent of ribosome
molecular_function
RNA binding
structural molecule activity
binding
protein binding
nucleic acid binding
heterocyclic compound binding
organic cyclic compound binding
oxidoreductase activity
electron transfer activity
ubiquitin ligase inhibitor activity
oxidoreductase activity, acting on a heme group of donors, oxygen as acceptor
cytochrome-c oxidase activity
heme-copper terminal oxidase activity
oxidoreductase activity, acting on a heme group of donors
ubiquitin-protein transferase inhibitor activity
oxidoreductase activity, acting on NAD(P)H
NADH dehydrogenase (quinone) activity
NADH dehydrogenase (ubiquinone) activity
NADH dehydrogenase activity
proton transmembrane transporter activity
oxidoreductase activity, acting on NAD(P)H, quinone or similar compound as acceptor
catalytic activity
ubiquitin-protein transferase regulator activity
mRNA 5'-UTR binding
Toll-like receptor 4 binding
ubiquitin protein ligase binding
ubiquitin-like protein ligase binding
oxidoreductase activity, acting on a sulfur group of donors
inorganic cation transmembrane transporter activity
enzyme inhibitor activity
monovalent inorganic cation transmembrane transporter activity
Toll-like receptor binding
cation transmembrane transporter activity
SRP-dependent cotranslational protein targeting to membrane
cotranslational protein targeting to membrane
protein targeting to ER
establishment of protein localization to endoplasmic reticulum
metabolic process
nuclear-transcribed mRNA catabolic process, nonsense-mediated decay
cellular metabolic process
protein localization to endoplasmic reticulum
cellular process
nuclear-transcribed mRNA catabolic process
protein targeting to membrane
translational initiation
biological_process
mRNA catabolic process
RNA catabolic process
nucleobase-containing compound catabolic process
establishment of protein localization to membrane
protein targeting
heterocycle catabolic process
cellular nitrogen compound catabolic process
aromatic compound catabolic process
organic cyclic compound catabolic process
establishment of protein localization to organelle
mRNA metabolic process
cellular macromolecule catabolic process
cellular macromolecule metabolic process
translation
transport
amide biosynthetic process
peptide biosynthetic process
establishment of localization
cellular amide metabolic process
cellular nitrogen compound metabolic process
cellular catabolic process
macromolecule metabolic process
cellular protein metabolic process
macromolecule catabolic process
peptide transport
peptide metabolic process
amide transport
protein localization to membrane
protein localization to organelle
organic substance metabolic process
heterocycle metabolic process
cellular aromatic compound metabolic process
nitrogen compound transport
primary metabolic process
nitrogen compound metabolic process
organic cyclic compound metabolic process
nucleobase-containing compound metabolic process
intracellular transport
intracellular protein transport
protein transport
catabolic process
regulation of metabolic process
protein metabolic process
organonitrogen compound metabolic process
establishment of protein localization
gene expression
biological regulation
localization
organic substance transport
cellular nitrogen compound biosynthetic process
cellular macromolecule biosynthetic process
RNA metabolic process
macromolecule biosynthetic process
nucleic acid metabolic process
organic substance catabolic process
establishment of localization in cell
cellular biosynthetic process
organic substance biosynthetic process
regulation of biological process
biosynthetic process
regulation of macromolecule metabolic process
organonitrogen compound biosynthetic process
protein localization
regulation of gene expression
cellular protein localization
cellular macromolecule localization
macromolecule localization
cellular localization
negative regulation of gene expression
negative regulation of biological process
negative regulation of macromolecule metabolic process
negative regulation of metabolic process
electron transport chain
ribonucleoprotein complex biogenesis
cytoplasmic translation
mitochondrial ATP synthesis coupled electron transport
ATP synthesis coupled electron transport
response to stimulus
oxidation-reduction process
cellular component organization or biogenesis
ribosome biogenesis
respiratory electron transport chain
cellular protein-containing complex assembly
regulation of response to stimulus
regulation of cellular process
rRNA processing
generation of precursor metabolites and energy
rRNA metabolic process
cellular response to stimulus
cellular component biogenesis
oxidative phosphorylation
signaling
positive regulation of biological process
protein-containing complex subunit organization
regulation of cellular metabolic process
regulation of biological quality
cell communication
signal transduction
cellular respiration
RNA processing
positive regulation of cellular process
negative regulation of ubiquitin protein ligase activity
regulation of signaling
ncRNA processing
mitochondrial electron transport, NADH to ubiquinone
ribonucleoprotein complex assembly
cellular protein modification process
protein modification process
ribonucleoprotein complex subunit organization
ATP metabolic process
response to biotic stimulus
macromolecule modification
energy derivation by oxidation of organic compounds
protein-containing complex assembly
regulation of primary metabolic process
ncRNA metabolic process
regulation of cell communication
proteolysis involved in cellular protein catabolic process
proton transmembrane transport
cellular response to chemical stimulus
ribosomal large subunit biogenesis
regulation of molecular function
phosphate-containing compound metabolic process
positive regulation of signal transduction by p53 class mediator
positive regulation of intracellular signal transduction
phosphorus metabolic process
cellular protein catabolic process
cellular component organization
regulation of nitrogen compound metabolic process
organelle organization
regulation of response to stress
response to other organism
response to external biotic stimulus
signal transduction by p53 class mediator
proteolysis
ubiquitin-dependent protein catabolic process
modification-dependent protein catabolic process
positive regulation of metabolic process
modification-dependent macromolecule catabolic process
homeostatic process
transmembrane transport
positive regulation of apoptotic process
positive regulation of programmed cell death
protein catabolic process
intracellular signal transduction
regulation of signal transduction
phosphorylation
regulation of cellular biosynthetic process
positive regulation of response to stimulus
positive regulation of signal transduction
organonitrogen compound catabolic process
response to oxygen-containing compound
multi-organism process
regulation of biosynthetic process
positive regulation of intrinsic apoptotic signaling pathway by p53 class mediator
response to bacterium
positive regulation of cell death
ion transport
regulation of signal transduction by p53 class mediator
response to stress
cellular component assembly
inorganic cation transmembrane transport
intrinsic apoptotic signaling pathway
regulation of cellular macromolecule biosynthetic process
positive regulation of molecular function
myeloid cell homeostasis
regulation of cellular catabolic process
protein modification by small protein conjugation or removal
positive regulation of NF-kappaB transcription factor activity
regulation of ubiquitin-dependent protein catabolic process
positive regulation of cell communication
positive regulation of signaling
regulation of cellular protein metabolic process
immune response
immune system process
regulation of intracellular signal transduction
regulation of macromolecule biosynthetic process
monovalent inorganic cation transport
cell death
cellular response to oxygen-containing compound
negative regulation of molecular function
cytosolic ribosome
cytoplasmic part
ribosomal subunit
cytoplasm
organelle
ribosome
cell part
membrane-bounded organelle
cell
intracellular part
intracellular
cytosolic part
intracellular organelle
organelle part
ribonucleoprotein complex
protein-containing complex
intracellular organelle part
cellular_component
intracellular membrane-bounded organelle
cytosol
cytosolic large ribosomal subunit
extracellular exosome
extracellular vesicle
extracellular organelle
intracellular non-membrane-bounded organelle
non-membrane-bounded organelle
extracellular region
large ribosomal subunit
small ribosomal subunit
membrane
cytosolic small ribosomal subunit
vesicle
nucleus
extracellular space
organelle lumen
membrane-enclosed lumen
intracellular organelle lumen
extracellular region part
mitochondrial respirasome
respirasome
mitochondrial membrane part
nucleoplasm
respiratory chain complex
mitochondrial membrane
focal adhesion
nuclear lumen
cell-substrate adherens junction
cell-substrate junction
mitochondrial envelope
nuclear part
catalytic complex
adherens junction
envelope
organelle envelope
anchoring junction
mitochondrial protein complex
mitochondrial part
mitochondrial inner membrane
organelle membrane
organelle inner membrane
inner mitochondrial membrane protein complex
mitochondrion
membrane protein complex
cytochrome complex
oxidoreductase complex
respiratory chain complex I
NADH dehydrogenase complex
mitochondrial respiratory chain complex I
membrane part
polysome
cell junction
respiratory chain complex IV
spliceosomal tri-snRNP complex
U4/U6 x U5 tri-snRNP complex
polysomal ribosome
U2-type precatalytic spliceosome
precatalytic spliceosome
endomembrane system
spliceosomal snRNP complex
U4 snRNP
small nuclear ribonucleoprotein complex
nucleolus
methylosome
cytoplasmic ribonucleoprotein granule
Sm-like protein family complex
U2-type spliceosomal complex
ribonucleoprotein granule
catalytic step 2 spliceosome
mitochondrial respiratory chain complex IV
endosome membrane
SMN-Sm protein complex
U5 snRNP
cytoplasmic vesicle part
U1 snRNP
endoplasmic reticulum
U2 snRNP
endosomal part

## Sheet: Table S5
Table S5 bridge_pathway
Ribosome
Oxidative phosphorylation
Parkinson disease
Non-alcoholic fatty liver disease (NAFLD)
Alzheimer disease
Huntington disease
Thermogenesis
Metabolic pathways
Retrograde endocannabinoid signaling
Spliceosome

## Sheet: Table S6
Table S6 crosstalk_gene
LOC642250
DPM1
PSMA6
LOC402057
DBI
ATP5O
COX7A2
ATP6V1G1
NDUFS4
TXNDC17
TOMM7
UQCRQ
PSMA4
LOC650518
SNRPG
ENY2
TMCO1
HINT1
CIP29
LOC650276
MAP2K1IP1
CEBPZ
LOC646766
LOC646200
LOC651064
ATP5C1
RPL17
RPS17
ANXA1
NDUFS5
C14ORF156
CHMP5
LOC440737
RPS27A
COX7C
NDUFA4
LOC648622
RPL11
LSM3
LOC285900
LOC642250
TOMM7
RPL17
CIP29
DBI
SNRPG
RPS17
RPS24
ATP5O
RPL26
LOC650276
UQCRQ
LOC653773
LOC648622
DNAJA1
LOC648000
COX7C
NDUFA4
RPS27
HINT1
PSMA4
CCDC72
LOC388532
COMMD6
LOC731640
NDUFB3
PFDN5
LOC442454
ENY2
LOC651202
C14ORF156
LSM3
RPL39
LOC389787
ANXA1
S100A8
RPL11
RPL31
LOC642989
LOC651436
PCDH11X
MAPK10
HFE
ATP7B
SORBS2
SORBS1
VEGFA
TAC1
RUFY2
ECE2
ACHE
VCAM1
FGA
CLU
GABRG2
MAPT
BRCA1
PCSK1
DNMT3B
MAPK8
BACE1
CACNB2
NOS3
SNCB
KLK10
VLDLR
LEPR
NCKAP1
SLC6A3
CAV2
PARK2
IL1A
SIRT5
FRMD6
LRP8
SERPINI1
EIF4E
PARG
SNX25
DIO2
REST
ATP2C1
MSRB3

## Sheet: Table S7
Table S7 bridge_gene
DPM1
PSMA6
LOC402057
ATP6V1G1
NDUFS4
TXNDC17
LOC650518
TMCO1
MAP2K1IP1
CEBPZ
LOC646766
LOC651064
ATP5C1
CHMP5
LOC440737
DNAJA1
PCDH11X
MAPK10
HFE
ATP7B
SORBS2
SORBS1
VEGFA
TAC1
RUFY2
ECE2
ACHE
VCAM1
FGA
CLU
GABRG2
MAPT
BRCA1
PCSK1
DNMT3B
MAPK8
BACE1
CACNB2
NOS3
SNCB
KLK10
VLDLR
LEPR
NCKAP1
SLC6A3
CAV2
PARK2
IL1A
SIRT5
FRMD6
LRP8
SERPINI1
EIF4E
PARG
SNX25
DIO2
REST
ATP2C1
MSRB3
LOC642250
DBI
ATP5O
COX7A2
TOMM7
UQCRQ
PSMA4
SNRPG
ENY2
HINT1
CIP29
LOC650276
LOC646200
RPL17
RPS17
ANXA1
NDUFS5
C14ORF156
RPS27A
COX7C
NDUFA4
LOC648622
RPL11
LSM3
LOC285900
RPS24
RPL26
LOC653773
LOC648000
RPS27
CCDC72
LOC388532
COMMD6
LOC731640
NDUFB3
PFDN5
LOC442454
LOC651202
RPL39
LOC389787
S100A8
RPL31
LOC642989
LOC651436
FCER1A
SNRPD2
LY96
CD52
RPL7
LOC653658
KLRB1
LOC654194
TXN
LOC388621
RPS3A
LOC643284
LDHB
LOC134997
LOC391656
RPL21
RPL23

## Sheet: Table S8
Table S8 differentially expressed miRNAs between AD and normal samples
row.names(tT)	logFC	AveExpr	t	P.Value	adj.P.Val	B
hsa-miR-208a-5p	0.589313	5.19778	8.81091	3.85992e-18	4.11885e-16	30.4675
hsa-miR-6761-3p	0.458672	4.25001	10.65	1.84946e-25	4.73648e-22	46.9369
hsa-miR-3646	0.430766	4.88251	7.01616	3.64557e-12	8.18975e-11	17.0873
hsa-miR-595	0.428224	3.39164	7.89955	5.88418e-15	2.80485e-13	23.3287
hsa-miR-6754-3p	0.423489	4.30412	9.08678	3.66316e-19	6.36944e-17	32.7649
hsa-miR-6736-3p	0.419584	4.03345	9.0646	4.43676e-19	7.10158e-17	32.5779
hsa-miR-6762-3p	0.415326	3.76013	8.87056	2.33196e-18	2.84388e-16	30.959
hsa-miR-4435	0.412811	6.94196	5.21715	2.10992e-07	2.0314e-06	6.52465
hsa-miR-6747-3p	0.412758	4.26464	9.46591	1.3011e-20	5.55351e-18	36.0236
hsa-miR-6716-3p	0.4102	3.32921	6.42942	1.78984e-10	3.03562e-09	13.321
hsa-miR-6778-3p	0.392533	3.74092	7.96626	3.52363e-15	1.8048e-13	23.8275
hsa-miR-6875-3p	0.391505	4.30596	9.36713	3.1393e-20	7.30887e-18	35.1634
hsa-miR-6753-3p	0.388643	3.65815	7.75229	1.80045e-14	7.43703e-13	22.2414
hsa-miR-6740-3p	0.385408	4.00482	8.31113	2.34245e-16	1.62136e-14	26.4661
hsa-miR-4747-3p	0.379623	5.24062	7.4316	1.92844e-13	5.81027e-12	19.938
hsa-miR-6787-3p	0.379556	3.9881	8.85481	2.66459e-18	3.10182e-16	30.8289
hsa-miR-6776-3p	0.37888	4.35921	9.37338	2.96996e-20	7.30887e-18	35.2175
hsa-miR-3173-5p	0.378652	3.55871	6.73621	2.42684e-11	4.78087e-10	15.2521
hsa-miR-5002-3p	0.37588	3.30905	6.59973	5.96431e-11	1.10686e-09	14.3826
hsa-miR-6783-3p	0.375275	3.58595	7.49811	1.18789e-13	3.88568e-12	20.4084
hsa-miR-6882-3p	0.375165	4.12225	8.36144	1.56417e-16	1.2379e-14	26.8594
hsa-miR-4440	0.373021	4.27869	7.74072	1.96429e-14	7.98501e-13	22.1567
hsa-miR-5193	0.372738	3.56012	6.22733	6.37655e-10	1.00186e-08	12.0951
hsa-miR-6833-3p	0.372391	3.99455	8.50046	5.06778e-17	4.47537e-15	27.9574
hsa-miR-4733-3p	0.371768	4.11841	6.94907	5.7783e-12	1.24571e-10	16.6411
hsa-miR-6829-3p	0.370881	3.81268	6.80296	1.55405e-11	3.13379e-10	15.6834
hsa-miR-3622a-3p	0.370577	4.16716	9.38055	2.78663e-20	7.30887e-18	35.2798
hsa-miR-4290	0.369117	3.68261	8.16272	7.61501e-16	4.40404e-14	25.3182
hsa-miR-6868-3p	0.367849	3.28704	6.82893	1.30528e-11	2.69582e-10	15.8522
hsa-miR-4455	0.367842	4.40972	5.96221	3.195e-09	4.30652e-08	10.5429
hsa-miR-6779-3p	0.363604	4.27627	8.8963	1.87454e-18	2.40035e-16	31.172
hsa-miR-3617-3p	0.362379	3.3493	7.49861	1.18352e-13	3.88568e-12	20.412
hsa-miR-6736-5p	0.362368	3.79537	6.9763	4.79525e-12	1.06788e-10	16.8218
hsa-miR-6809-3p	0.36189	3.73556	7.64136	4.13004e-14	1.62724e-12	21.4346
hsa-miR-675-3p	0.360732	3.85163	7.78699	1.38564e-14	5.94534e-13	22.496
hsa-miR-6886-3p	0.358532	4.49892	7.89888	5.91418e-15	2.80485e-13	23.3238
hsa-miR-4685-3p	0.358054	4.57889	8.99772	7.88843e-19	1.12235e-16	32.0164
hsa-miR-642b-5p	0.357417	3.56369	7.58789	6.13929e-14	2.2461e-12	21.0494
hsa-miR-4713-5p	0.357211	4.51391	9.61745	3.31752e-21	2.83205e-18	37.3586
hsa-miR-187-3p	0.355865	3.21788	6.23491	6.08404e-10	9.61804e-09	12.1404
hsa-miR-6738-3p	0.351755	3.44498	6.64562	4.41615e-11	8.44012e-10	14.6731
hsa-miR-6893-3p	0.35173	4.12588	7.63402	4.36153e-14	1.69241e-12	21.3816
hsa-miR-4695-3p	0.351182	4.68744	8.55685	3.19377e-17	2.92116e-15	28.4073
hsa-miR-3605-3p	0.348935	3.61664	6.72814	2.56056e-11	5.0058e-10	15.2002
hsa-miR-487b-5p	0.348132	3.76944	7.39725	2.47288e-13	7.19663e-12	19.6966
hsa-miR-449b-3p	0.347075	4.43654	8.59203	2.39117e-17	2.35531e-15	28.6894
hsa-miR-6744-5p	0.346725	3.79471	7.04249	3.03942e-12	7.07631e-11	17.2635
hsa-miR-6772-3p	0.346253	3.30667	6.55654	7.90045e-11	1.44522e-09	14.1109
hsa-miR-4701-3p	0.345162	3.60285	6.44445	1.62611e-10	2.77631e-09	13.4136
hsa-miR-574-5p	0.343264	4.21709	7.33592	3.84563e-13	1.10659e-11	19.2681
hsa-miR-6867-3p	0.341956	4.50906	9.51041	8.72662e-21	4.46977e-18	36.4137
hsa-miR-1471	0.341646	4.43661	9.37021	3.05481e-20	7.30887e-18	35.19
hsa-miR-6748-3p	0.340629	3.89992	7.56643	7.19309e-14	2.52349e-12	20.8956
hsa-miR-433-5p	0.339954	3.92555	4.78752	1.88031e-06	1.53849e-05	4.44114
hsa-miR-6873-3p	0.339324	3.44658	6.1868	8.19158e-10	1.26377e-08	11.8537
hsa-miR-1538	0.338486	4.01224	9.53892	6.75104e-21	4.32235e-18	36.6645
hsa-miR-3692-5p	0.337807	3.90276	6.02337	2.21535e-09	3.10909e-08	10.8953
hsa-miR-3191-5p	0.335861	3.68988	7.25922	6.64982e-13	1.8312e-11	18.7368
hsa-miR-7110-3p	0.335504	4.31915	8.3789	1.35886e-16	1.1226e-14	26.9965
hsa-miR-6855-3p	0.334651	3.45176	7.40031	2.41881e-13	7.1202e-12	19.7181
hsa-miR-6894-3p	0.333255	4.70433	7.60793	5.29304e-14	1.99345e-12	21.1935
hsa-miR-6750-3p	0.330506	4.40342	7.95131	3.95399e-15	1.94734e-13	23.7154
hsa-miR-5189-3p	0.329416	4.20115	7.05361	2.8143e-12	6.61231e-11	17.3381
hsa-miR-6751-3p	0.329203	3.79914	7.24541	7.33453e-13	1.99827e-11	18.6417
hsa-miR-7152-5p	0.328806	3.41884	6.96013	5.35715e-12	1.18273e-10	16.7144
hsa-miR-487a-5p	0.328796	3.34199	6.52875	9.45818e-11	1.7058e-09	13.937
hsa-miR-4297	0.326826	3.31166	6.06061	1.76974e-09	2.54624e-08	11.1115
hsa-miR-5589-5p	0.326406	3.66055	5.85953	5.86384e-09	7.54637e-08	9.95885
hsa-miR-885-5p	0.326352	3.50368	7.1323	1.6273e-12	3.96906e-11	17.869
hsa-miR-6501-5p	0.325676	4.16345	5.28172	1.4969e-07	1.48574e-06	6.85263
hsa-miR-6840-3p	0.325275	8.28628	9.4086	2.17095e-20	7.30887e-18	35.5236
hsa-miR-6883-3p	0.325264	3.685	7.14247	1.51549e-12	3.76814e-11	17.938
hsa-miR-4268	0.324938	4.16469	8.41825	9.8879e-17	8.44097e-15	27.3062
hsa-miR-485-3p	0.324932	3.58182	7.50393	1.13841e-13	3.83614e-12	20.4497
hsa-miR-345-3p	0.321937	5.5877	6.15986	9.66718e-10	1.45177e-08	11.694
hsa-miR-466	0.321649	3.04531	5.19437	2.37934e-07	2.27369e-06	6.40989
hsa-miR-585-5p	0.320882	3.79902	5.61103	2.45105e-08	2.84033e-07	8.58533
hsa-miR-6862-3p	0.318564	4.77244	8.12836	9.97793e-16	5.43691e-14	25.0552
hsa-miR-6514-3p	0.316204	3.20417	5.94656	3.50698e-09	4.67781e-08	10.4532
hsa-miR-629-3p	0.316146	2.9981	5.74571	1.13687e-08	1.39308e-07	9.32268
hsa-miR-6780b-3p	0.31588	4.261	8.28952	2.78434e-16	1.8765e-14	26.2978
hsa-miR-6830-3p	0.312643	3.53652	5.40197	7.81955e-08	8.14059e-07	7.47373
hsa-miR-4722-3p	0.311691	4.08993	6.0229	2.22165e-09	3.10909e-08	10.8926
hsa-miR-149-5p	0.311089	4.05063	7.84745	8.75892e-15	3.86752e-13	22.9419
hsa-miR-6803-3p	0.310892	4.68996	8.82084	3.54994e-18	3.95278e-16	30.5491
hsa-miR-6782-3p	0.310678	3.73956	6.02326	2.21685e-09	3.10909e-08	10.8946
hsa-miR-6835-5p	0.310519	4.19229	5.543	3.5907e-08	4.01563e-07	8.2192
hsa-miR-4642	0.309814	3.38493	6.79493	1.64e-11	3.28129e-10	15.6313
hsa-miR-211-5p	0.307583	3.27188	6.05061	1.87992e-09	2.68965e-08	11.0534
hsa-miR-4732-3p	0.307432	3.40074	6.53182	9.27235e-11	1.68415e-09	13.9562
hsa-miR-6859-5p	0.305037	3.37749	5.68232	1.63537e-08	1.96629e-07	8.97359
hsa-miR-3192-3p	0.304935	3.60074	7.76286	1.66259e-14	6.98017e-13	22.3188
hsa-miR-6856-5p	0.303862	3.25973	6.10999	1.31138e-09	1.94129e-08	11.4002
hsa-miR-3151-3p	0.30328	4.51958	8.5817	2.60344e-17	2.46941e-15	28.6065
hsa-miR-6802-3p	0.300164	4.52324	8.9848	8.81189e-19	1.18775e-16	31.9084
hsa-miR-4326	0.300102	3.05234	4.6078	4.46583e-06	3.46575e-05	3.62084
hsa-miR-6741-3p	0.299999	4.51836	7.87569	7.06203e-15	3.17296e-13	23.1513
hsa-miR-6786-3p	0.299481	4.5317	9.08467	3.73064e-19	6.36944e-17	32.7471
hsa-miR-6823-3p	0.299153	4.25095	7.49688	1.19863e-13	3.88568e-12	20.3997
hsa-miR-6885-3p	0.298804	4.31746	8.22436	4.67741e-16	2.99471e-14	25.7927
hsa-miR-99b-3p	0.297829	2.83456	4.7261	2.53546e-06	2.03552e-05	4.1574
hsa-miR-6511a-3p	0.295965	4.30515	6.38286	2.40624e-10	4.05421e-09	13.0353
hsa-miR-6827-3p	0.295749	3.41029	6.95784	5.44158e-12	1.1911e-10	16.6993
hsa-miR-3064-5p	0.295422	3.34034	5.088	4.14476e-07	3.80447e-06	5.88027
hsa-miR-3156-3p	0.2931	4.07397	8.26181	3.47296e-16	2.28058e-14	26.0826
hsa-miR-6876-5p	0.292954	3.68604	6.19475	7.79976e-10	1.21062e-08	11.9009
hsa-miR-1229-3p	0.29256	4.93334	9.21785	1.17073e-19	2.30633e-17	33.8783
hsa-miR-1288-3p	0.290437	3.93774	4.13034	3.85152e-05	0.000247212	1.58937
hsa-miR-1293	0.288441	3.15454	5.86879	5.55351e-09	7.1831e-08	10.0111
hsa-miR-3184-3p	0.288325	4.21111	7.07784	2.37875e-12	5.64071e-11	17.501
hsa-miR-1233-3p	0.287482	4.27552	7.45542	1.62195e-13	5.04659e-12	20.106
hsa-miR-6804-3p	0.286411	5.02337	8.17081	7.14421e-16	4.40404e-14	25.3804
hsa-miR-615-3p	0.284135	3.61083	6.27677	4.68898e-10	7.5053e-09	12.3916
hsa-miR-6789-3p	0.283981	3.89294	5.80753	7.94647e-09	1.00747e-07	9.66673
hsa-miR-6849-3p	0.283766	3.4613	6.44492	1.62118e-10	2.77631e-09	13.4165
hsa-miR-6881-3p	0.283254	3.22351	6.09589	1.42892e-09	2.09112e-08	11.3175
hsa-miR-371b-3p	0.282887	4.37361	9.29424	5.98343e-20	1.27696e-17	34.5336
hsa-miR-3651	0.282211	2.6266	4.22614	2.54183e-05	0.000169522	1.97969
hsa-miR-6757-3p	0.282154	3.11513	5.19457	2.37693e-07	2.27369e-06	6.41086
hsa-miR-6867-5p	0.281647	3.27793	5.47392	5.2689e-08	5.59902e-07	7.85176
hsa-miR-6780a-5p	0.281533	3.81994	5.44952	6.02692e-08	6.35183e-07	7.72302
hsa-miR-6072	0.281219	2.91675	4.84172	1.44013e-06	1.20782e-05	4.69452
hsa-miR-6881-5p	0.281167	3.31838	6.17725	8.68768e-10	1.31652e-08	11.797
hsa-miR-7155-3p	0.280735	3.14597	4.50294	7.29766e-06	5.40153e-05	3.15621
hsa-miR-7151-3p	0.279933	3.50989	5.73991	1.17545e-08	1.43349e-07	9.29063
hsa-miR-4314	0.279768	2.88845	5.57504	3.00133e-08	3.41618e-07	8.39109
hsa-miR-4755-3p	0.279061	3.06194	2.71317	0.00675151	0.025205	-3.15797
hsa-miR-8085	0.278558	4.4592	6.74803	2.24338e-11	4.45372e-10	15.3281
hsa-miR-6857-3p	0.277975	3.52461	6.85157	1.1205e-11	2.33301e-10	15.9999
hsa-miR-3944-3p	0.277611	3.96192	7.30319	4.86108e-13	1.35318e-11	19.0407
hsa-miR-194-3p	0.27754	3.52588	6.23589	6.04724e-10	9.61804e-09	12.1462
hsa-miR-3158-3p	0.277258	2.84559	5.48019	5.08957e-08	5.46888e-07	7.88493
hsa-miR-1273f	0.277123	5.1543	5.32096	1.21284e-07	1.22286e-06	7.05382
hsa-miR-6846-3p	0.276455	3.91127	6.66617	3.85782e-11	7.42848e-10	14.8038
hsa-miR-2278	0.276343	3.88238	5.28428	1.47652e-07	1.47135e-06	6.86573
hsa-miR-6769a-3p	0.27614	4.53449	8.16068	7.73846e-16	4.40404e-14	25.3026
hsa-miR-3064-3p	0.275979	2.87291	3.98887	7.00589e-05	0.00042019	1.02895
hsa-miR-6814-3p	0.275588	2.97012	4.25373	2.25168e-05	0.000151752	2.09368
hsa-miR-30b-3p	0.274996	4.70069	5.17319	2.65966e-07	2.50419e-06	6.30356
hsa-miR-1250-3p	0.274394	3.39284	5.42821	6.7747e-08	7.08163e-07	7.61104
hsa-miR-6878-3p	0.274245	3.24581	4.8748	1.22223e-06	1.03646e-05	4.85048
hsa-miR-1273g-5p	0.272814	3.22409	4.54695	5.9458e-06	4.4918e-05	3.34993
hsa-miR-1304-3p	0.272691	3.54885	6.18577	8.24364e-10	1.26419e-08	11.8475
hsa-miR-6792-3p	0.272663	4.86043	8.13684	9.33491e-16	5.19711e-14	25.12
hsa-miR-6742-3p	0.271613	3.28424	5.16493	2.77733e-07	2.6054e-06	6.26223
hsa-miR-518c-5p	0.270935	3.82527	4.88089	1.18572e-06	1.019e-05	4.87931
hsa-miR-4305	0.270494	3.08342	5.61281	2.42661e-08	2.82479e-07	8.59494
hsa-miR-4279	0.269931	4.91633	7.46887	1.47053e-13	4.64942e-12	20.2012
hsa-miR-6743-3p	0.267664	4.88215	8.3332	1.96256e-16	1.39614e-14	26.6384
hsa-miR-6794-3p	0.267419	3.96416	7.1625	1.31685e-12	3.37244e-11	18.0742
hsa-miR-6821-3p	0.266825	2.86801	3.86796	0.000115139	0.000656726	0.565084
hsa-miR-7109-3p	0.266531	5.08521	8.34674	1.76048e-16	1.32605e-14	26.7443
hsa-miR-1207-3p	0.26601	2.93418	4.17519	3.17384e-05	0.000206824	1.77103
hsa-miR-6764-5p	0.265293	3.08908	4.58598	4.95037e-06	3.79578e-05	3.52331
hsa-miR-6870-3p	0.26461	4.0792	6.94881	5.78836e-12	1.24571e-10	16.6395
hsa-miR-4682	0.264313	3.38139	4.47663	8.24132e-06	6.04757e-05	3.0413
hsa-miR-138-1-3p	0.263949	2.97319	4.45948	8.91843e-06	6.45201e-05	2.96671
hsa-miR-3620-3p	0.263489	4.07062	7.22056	8.74648e-13	2.30925e-11	18.471
hsa-miR-6826-3p	0.263246	4.62622	7.98546	3.03813e-15	1.62097e-13	23.9717
hsa-miR-3187-5p	0.263156	4.41716	7.50774	1.10708e-13	3.78032e-12	20.4768
hsa-miR-7160-5p	0.263062	4.65113	7.23682	7.79554e-13	2.07962e-11	18.5826
hsa-miR-195-3p	-0.264575	2.46285	-3.60405	0.000325039	0.00170418	-0.398867
hsa-miR-3181	-0.264969	2.33548	-3.66856	0.000253696	0.00135076	-0.169379
hsa-miR-30d-5p	-0.287528	3.61734	-5.1205	3.50217e-07	3.23792e-06	6.04095
hsa-miR-646	-0.290623	2.38555	-3.23363	0.00125271	0.00575975	-1.6391
hsa-miR-6765-3p	-0.295292	6.32423	-4.54928	5.88115e-06	4.4561e-05	3.36028
hsa-miR-548s	-0.309993	2.18919	-3.76172	0.000176189	0.000958006	0.169053
hsa-miR-106a-3p	-0.320909	2.24955	-3.8115	0.000144533	0.000804671	0.353278
hsa-miR-887-5p	-0.335733	4.3017	-4.55558	5.7104e-06	4.35248e-05	3.38815
hsa-miR-6070	-0.342547	2.12806	-4.48334	7.99037e-06	5.88027e-05	3.07051
hsa-miR-3184-5p	-0.348809	8.20988	-10.0182	8.18412e-23	1.04798e-19	40.977
hsa-miR-520f-5p	-0.353881	2.57077	-4.59928	4.64945e-06	3.58652e-05	3.58268
hsa-miR-516a-5p	-0.374066	2.21417	-4.67092	3.30684e-06	2.61384e-05	3.9055
hsa-miR-22-3p	-0.414319	2.86836	-4.66477	3.40577e-06	2.68375e-05	3.87756
hsa-miR-125b-1-3p	-0.418997	4.71196	-3.86971	0.00011432	0.000654418	0.571735
hsa-miR-24-3p	-0.435902	4.72967	-4.53304	6.34459e-06	4.75102e-05	3.28853
hsa-miR-6131	-0.441457	6.90367	-4.07693	4.83797e-05	0.000302935	1.37556
hsa-miR-125a-3p	-0.49018	6.88755	-5.70691	1.42086e-08	1.71643e-07	9.10857

## Sheet: Table S9
Table S9 differentially expressed miRNAs between MCI and normal samples
row.names(tT)	logFC	AveExpr	t	P.Value	adj.P.Val	B
hsa-miR-4419a	0.691037	5.29548	5.57487	5.24e-08	0.000134302	7.6829
hsa-miR-7854-3p	0.497778	3.84407	2.91872	0.00376211	0.14787	-1.96573
hsa-miR-5698	0.49564	6.40891	2.50135	0.0128678	0.225716	-2.97272
hsa-miR-4314	0.490837	2.71932	3.47113	0.000588939	0.0921242	-0.409353
hsa-miR-6782-3p	0.472631	3.5445	3.25263	0.00126457	0.102032	-1.05492
hsa-miR-6736-3p	0.463619	3.75254	3.3632	0.000863327	0.0921242	-0.733097
hsa-miR-6833-3p	0.45343	3.74943	3.48946	0.00055136	0.0921242	-0.353422
hsa-miR-6760-5p	0.450697	4.40719	3.58123	0.000394713	0.0918963	-0.06941
hsa-miR-7106-3p	0.440737	4.34922	4.4788	1.04e-05	0.013363	3.05713
hsa-miR-4748	0.439819	3.99962	3.40816	0.000737044	0.0921242	-0.59938
hsa-miR-6875-3p	0.438636	4.04446	3.62872	0.000331109	0.0847971	0.0802179
hsa-miR-3622b-5p	0.429227	4.33481	3.52335	0.000487735	0.0921242	-0.249325
hsa-miR-1471	0.419551	4.21209	3.65948	0.000295192	0.0839984	0.17811
hsa-miR-4698	0.415128	4.30324	2.69219	0.00746942	0.173902	-2.53059
hsa-miR-3653-5p	0.414582	2.89936	2.97219	0.0031795	0.140834	-1.82609
hsa-miR-6744-5p	0.413082	3.56558	2.91218	0.00383963	0.14787	-1.98263
hsa-miR-6743-3p	0.411138	4.71449	4.33601	1.94e-05	0.0165839	2.5184
hsa-miR-4717-3p	0.406613	4.11567	3.14192	0.00183428	0.115024	-1.36714
hsa-miR-6867-3p	0.401867	4.28252	3.85393	0.0001403	0.0598846	0.814236
hsa-miR-6747-3p	0.400241	3.98272	3.14074	0.00184146	0.115024	-1.37041
hsa-miR-6750-3p	0.399065	4.18554	3.22719	0.00137865	0.102032	-1.12755
hsa-miR-4695-3p	0.397486	4.45328	3.36626	0.000854115	0.0921242	-0.724033
hsa-miR-675-3p	0.396888	3.60996	3.20501	0.00148586	0.102846	-1.19047
hsa-miR-615-3p	0.396201	3.42883	3.26789	0.00120041	0.102032	-1.01109
hsa-miR-6754-3p	0.39527	4.01333	2.80209	0.00538448	0.169497	-2.26194
hsa-miR-3192-3p	0.393544	3.40225	3.44297	0.000651359	0.0921242	-0.494739
hsa-miR-4496	0.392966	3.74304	2.47498	0.0138384	0.232983	-3.03137
hsa-miR-6501-5p	0.392413	3.94867	2.0736	0.038911	0.34296	-3.84999
hsa-miR-6761-3p	0.391654	3.93141	3.0741	0.00229184	0.117388	-1.55338
hsa-miR-6750-5p	0.389754	3.77443	3.02989	0.00264444	0.130239	-1.67276
hsa-miR-6735-3p	0.389489	3.75078	3.6742	0.00027933	0.0839984	0.225226
hsa-miR-6753-5p	0.388278	4.97089	3.16638	0.00169107	0.111047	-1.29902
hsa-miR-6748-3p	0.387198	3.67296	2.90032	0.003984	0.14787	-2.0132
hsa-miR-6835-5p	0.385766	3.98866	2.45009	0.0148136	0.235638	-3.08618
hsa-miR-6783-3p	0.385248	3.33176	2.79547	0.00549326	0.169497	-2.27841
hsa-miR-487a-5p	0.382749	3.1238	2.75264	0.00624677	0.171342	-2.38409
hsa-miR-6849-5p	0.381851	4.35578	2.86038	0.00450767	0.151897	-2.11533
hsa-miR-3124-5p	0.380743	2.99193	2.07228	0.039034	0.34296	-3.85244
hsa-miR-1288-3p	0.379508	3.74916	1.9836	0.0481485	0.34296	-4.0143
hsa-miR-4440	0.379347	4.02568	2.68607	0.00760444	0.17545	-2.54525
hsa-miR-4732-3p	0.377867	3.19873	2.83588	0.00485903	0.157519	-2.1773
hsa-miR-6730-5p	0.370926	3.30728	2.70196	0.00725814	0.172112	-2.50711
hsa-miR-210-3p	0.370205	3.41292	2.52518	0.0120433	0.220306	-2.91921
hsa-miR-485-3p	0.369088	3.36529	2.99846	0.00292469	0.138706	-1.75663
hsa-miR-4487	0.369049	4.4041	3.0543	0.00244401	0.122728	-1.60704
hsa-miR-1293	0.366696	2.96623	2.74673	0.00635766	0.171342	-2.39854
hsa-miR-6779-3p	0.364488	4.02911	2.97932	0.00310844	0.140834	-1.80731
hsa-miR-6865-5p	0.363066	4.72027	3.22642	0.00138226	0.102032	-1.12975
hsa-miR-7110-3p	0.362818	4.09374	3.10747	0.002055	0.115874	-1.46223
hsa-miR-211-5p	0.361834	3.06816	2.50153	0.0128616	0.225716	-2.97233
hsa-miR-3156-3p	0.359504	3.88131	3.38791	0.000791636	0.0921242	-0.659823
hsa-miR-134-3p	0.359444	3.71791	2.9139	0.00381912	0.14787	-1.97819
hsa-miR-5189-3p	0.35826	3.98004	2.54692	0.0113324	0.210307	-2.86997
hsa-miR-6839-5p	0.357753	3.3321	2.38252	0.0177742	0.255729	-3.23229
hsa-miR-4788	0.354952	4.02044	2.85032	0.00464895	0.15264	-2.14082
hsa-miR-1538	0.353877	3.78361	3.43451	0.000671274	0.0921242	-0.52025
hsa-miR-4538	0.352874	3.28265	2.44426	0.0150507	0.236355	-3.09894
hsa-miR-519d-3p	0.352493	3.03168	2.79821	0.00544804	0.169497	-2.27161
hsa-miR-6753-3p	0.35194	3.39021	2.6301	0.00894587	0.189768	-2.67785
hsa-miR-6889-3p	0.351519	3.86125	3.68075	0.000272533	0.0839984	0.246248
hsa-miR-6776-3p	0.35074	4.09876	2.72494	0.00678255	0.171342	-2.4516
hsa-miR-514b-5p	0.350608	3.76903	2.47438	0.0138612	0.232983	-3.03269
hsa-miR-6855-3p	0.349561	3.22569	2.76025	0.00610649	0.171342	-2.36544
hsa-miR-3945	0.349107	3.54144	2.55026	0.0112266	0.210237	-2.86237
hsa-miR-4489	0.3487	3.9531	2.72974	0.00668685	0.171342	-2.43995
hsa-miR-6780a-5p	0.348269	3.63518	2.41608	0.0162443	0.236669	-3.16021
hsa-miR-6886-3p	0.348256	4.25409	2.47247	0.0139341	0.232983	-3.03692
hsa-miR-6832-3p	0.346326	3.28511	2.43996	0.0152279	0.236355	-3.10835
hsa-miR-4436b-3p	0.346309	2.77552	2.35848	0.0189468	0.262285	-3.28332
hsa-miR-885-5p	0.34467	3.2836	2.70622	0.00716781	0.171558	-2.49686
hsa-miR-6787-3p	0.343842	3.72643	2.62361	0.0091142	0.189768	-2.69304
hsa-miR-6809-3p	0.341407	3.48743	2.56212	0.010858	0.209078	-2.83531
hsa-miR-4713-5p	0.340824	4.26937	3.00563	0.00285846	0.138123	-1.73757
hsa-miR-6868-3p	0.340768	3.0342	2.37574	0.0180983	0.257371	-3.24673
hsa-miR-6086	0.340533	5.51412	3.38965	0.00078679	0.0921242	-0.65463
hsa-miR-6748-5p	0.338989	4.21761	2.74721	0.00634863	0.171342	-2.39737
hsa-miR-4747-5p	0.337087	3.87393	2.74937	0.006308	0.171342	-2.3921
hsa-miR-3130-5p	0.335424	3.59889	2.91305	0.00382921	0.14787	-1.98038
hsa-miR-6887-3p	0.335348	4.56215	4.08303	5.61e-05	0.0359352	1.6018
hsa-miR-508-5p	0.333885	4.13265	1.97698	0.0488966	0.34296	-4.02613
hsa-miR-8085	0.332657	4.27519	2.60014	0.00974776	0.198127	-2.74772
hsa-miR-936	0.331592	3.18608	2.48605	0.0134235	0.230637	-3.00683
hsa-miR-6736-5p	0.329706	3.5457	2.14348	0.0328232	0.34296	-3.71752
hsa-miR-4476	0.328164	7.78553	3.11959	0.00197468	0.115874	-1.42888
hsa-miR-6728-3p	0.324701	4.34685	3.21549	0.00143427	0.102032	-1.16079
hsa-miR-6762-3p	0.323078	3.46849	2.42181	0.0159952	0.236669	-3.14782
hsa-miR-6890-5p	0.32166	3.87346	2.51202	0.0124928	0.22531	-2.94883
hsa-miR-6734-5p	0.321254	3.91058	2.15532	0.0318772	0.34296	-3.69465
hsa-miR-4639-3p	0.320489	2.83635	1.98918	0.0475269	0.34296	-4.00433
hsa-miR-3187-5p	0.320481	4.24395	2.85584	0.00457097	0.152029	-2.12685
hsa-miR-371b-3p	0.318929	4.18485	3.34878	0.000907918	0.0930071	-0.775633
hsa-miR-6831-3p	0.318227	3.44085	2.71902	0.00690234	0.171342	-2.46595
hsa-miR-6824-3p	0.317313	3.25927	2.90436	0.00393435	0.14787	-2.00281
hsa-miR-3191-5p	0.314945	3.45941	2.44118	0.0151773	0.236355	-3.10568
hsa-miR-3158-3p	0.314839	2.66082	2.16011	0.0315014	0.34296	-3.68537
hsa-miR-3620-3p	0.314352	3.89654	2.86111	0.0044975	0.151897	-2.11347
hsa-miR-139-3p	0.313626	4.77352	2.55718	0.0110101	0.210237	-2.84659
hsa-miR-6803-3p	0.312187	4.47868	2.93664	0.00355672	0.146915	-1.91918
hsa-miR-4800-5p	0.310923	4.75643	2.62798	0.00900064	0.189768	-2.68282
hsa-miR-6882-3p	0.310739	3.8607	2.34094	0.0198448	0.268026	-3.32025
hsa-miR-657	0.310448	2.92943	2.49611	0.0130559	0.227457	-2.98443
hsa-miR-8064	0.308923	3.98069	2.42765	0.0157444	0.236669	-3.13514
hsa-miR-3184-3p	0.308577	4.01708	2.54963	0.0112466	0.210237	-2.86381
hsa-miR-3617-3p	0.307031	3.09735	2.34017	0.0198848	0.268026	-3.32185
hsa-miR-664b-3p	0.30628	3.46717	2.7138	0.00700958	0.171342	-2.47858
hsa-miR-185-3p	0.305904	4.24267	2.57965	0.0103329	0.202005	-2.79509
hsa-miR-6846-3p	0.305141	3.72615	2.76269	0.006062	0.171342	-2.35943
hsa-miR-6734-3p	0.304735	3.62186	2.57321	0.0105229	0.204161	-2.80988
hsa-miR-3175	0.302511	4.73083	2.23964	0.0257962	0.31016	-3.52828
hsa-miR-6890-3p	0.302056	3.95504	3.0906	0.00217179	0.115874	-1.50844
hsa-miR-34c-3p	0.300474	2.54951	1.99505	0.0468792	0.34296	-3.9938
hsa-miR-483-3p	0.300334	4.05702	2.72815	0.0067185	0.171342	-2.44382
hsa-miR-6770-3p	0.300169	4.27003	2.88428	0.00418728	0.148184	-2.05438
hsa-miR-3925-5p	0.298461	3.78457	2.16335	0.0312493	0.34296	-3.67908
hsa-miR-6873-3p	0.297846	3.2117	2.09531	0.0369235	0.34296	-3.80928
hsa-miR-5708	0.297678	2.74481	2.10799	0.0358038	0.34296	-3.78532
hsa-miR-920	0.297645	4.45531	2.247	0.0253169	0.305833	-3.51347
hsa-miR-885-3p	0.297353	4.33078	2.25129	0.0250409	0.303932	-3.50481
hsa-miR-1254	0.297308	5.95228	2.70984	0.00709187	0.171342	-2.48814
hsa-miR-6871-5p	0.29689	4.28982	2.1948	0.0288912	0.334465	-3.61752
hsa-miR-6738-3p	0.296031	3.20022	1.97866	0.0487058	0.34296	-4.02313
hsa-miR-1306-5p	0.294203	4.57283	3.24046	0.00131804	0.102032	-1.08975
hsa-miR-5002-3p	0.293796	3.04525	2.02062	0.0441459	0.34296	-3.94757
hsa-miR-6794-3p	0.292859	3.78486	2.73003	0.00668104	0.171342	-2.43924
hsa-miR-3940-3p	0.292261	4.19365	2.88166	0.00422127	0.148184	-2.06107
hsa-miR-6856-5p	0.29221	3.05194	2.08197	0.038134	0.34296	-3.83434
hsa-miR-4728-5p	0.291481	7.03647	3.54428	0.000451955	0.0921242	-0.184585
hsa-miR-6834-3p	0.290608	3.97777	2.81574	0.00516633	0.165387	-2.22787
hsa-miR-149-5p	0.290553	3.83704	2.46813	0.0141009	0.232983	-3.0465
hsa-miR-6847-3p	0.290402	2.66357	2.02284	0.0439156	0.34296	-3.94354
hsa-miR-5006-5p	0.290053	4.75023	2.01603	0.0446268	0.34296	-3.95592
hsa-miR-302c-5p	0.287346	3.4501	2.33326	0.0202497	0.27007	-3.33634
hsa-miR-194-3p	0.285959	3.338	2.28844	0.0227588	0.288541	-3.42916
hsa-miR-150-3p	0.285854	6.81414	3.2213	0.00140641	0.102032	-1.1443
hsa-miR-4697-3p	0.285174	3.87491	3.11913	0.00197765	0.115874	-1.43013
hsa-miR-6887-5p	0.284274	6.54332	2.69354	0.00743985	0.173902	-2.52735
hsa-miR-6726-3p	0.284146	4.48638	2.88146	0.0042239	0.148184	-2.06159
hsa-miR-6769a-3p	0.283094	4.34741	2.73664	0.00655133	0.171342	-2.42316
hsa-miR-595	0.282605	3.08589	1.96948	0.0497549	0.34296	-4.03946
hsa-miR-4329	0.282443	3.02295	2.48375	0.0135086	0.230637	-3.01193
hsa-miR-4268	0.281801	3.93943	2.52224	0.0121423	0.220542	-2.92583
hsa-miR-193a-5p	0.281416	3.31808	2.03397	0.0427732	0.34296	-3.92321
hsa-miR-3675-3p	0.281386	4.81144	3.28962	0.00111427	0.102032	-0.948383
hsa-miR-1909-5p	0.279848	3.53189	2.45482	0.0146237	0.235638	-3.0758
hsa-miR-4685-3p	0.279144	4.32753	2.33293	0.0202673	0.27007	-3.33703
hsa-miR-3122	0.278979	4.3035	2.78717	0.00563249	0.171342	-2.29901
hsa-miR-7160-5p	0.277697	4.47372	2.43755	0.0153278	0.236473	-3.1136
hsa-miR-6870-3p	0.277621	3.90057	2.59239	0.00996551	0.200706	-2.76568
hsa-miR-6862-3p	0.276931	4.55165	2.30223	0.0219592	0.285991	-3.40078
hsa-miR-3153	0.275736	3.15377	2.29782	0.0222125	0.285991	-3.40989
hsa-miR-6511b-3p	0.275171	4.64065	2.34735	0.0195122	0.267223	-3.30678
hsa-miR-3610	0.274942	4.58687	2.08433	0.037918	0.34296	-3.82993
hsa-miR-3154	0.274341	6.20167	3.28362	0.00113747	0.102032	-0.965744
hsa-miR-6894-3p	0.273521	4.47175	2.02034	0.0441751	0.34296	-3.94808
hsa-miR-6826-3p	0.272491	4.44814	2.71172	0.00705264	0.171342	-2.4836
hsa-miR-6879-3p	0.272394	4.98669	3.08099	0.00224099	0.117126	-1.53464
hsa-miR-6894-5p	0.272075	5.60055	3.38798	0.000791426	0.0921242	-0.659599
hsa-miR-6815-5p	0.271798	4.50829	2.10218	0.0363134	0.34296	-3.79632
hsa-miR-6740-3p	0.271491	3.73136	2.01726	0.044497	0.34296	-3.95368
hsa-miR-7111-3p	0.271314	4.50146	2.65319	0.00836857	0.186364	-2.62346
hsa-miR-7155-5p	0.270249	5.00715	2.72189	0.00684408	0.171342	-2.459
hsa-miR-6751-3p	0.270209	3.56939	2.0873	0.0376466	0.34296	-3.82435
hsa-miR-23a-5p	0.269002	4.7432	2.45056	0.0147949	0.235638	-3.08516
hsa-miR-6786-3p	0.268745	4.32498	2.74862	0.00632197	0.171342	-2.39391
hsa-miR-5699-5p	0.26665	3.57853	1.98307	0.0482086	0.34296	-4.01526
hsa-miR-6893-3p	0.266265	3.87817	2.06379	0.0398382	0.34296	-3.86824
hsa-miR-6877-3p	0.265257	4.59404	2.9712	0.00318952	0.140834	-1.82871
hsa-miR-6804-3p	0.26498	4.82647	2.50687	0.0126726	0.225629	-2.96038
hsa-miR-550a-3p	0.264505	2.89159	2.01591	0.044639	0.34296	-3.95613
hsa-miR-6801-3p	0.264497	4.33604	2.90059	0.00398072	0.14787	-2.01251
hsa-miR-6885-3p	0.26404	4.11081	2.58039	0.010311	0.202005	-2.79336
hsa-miR-6789-3p	0.263835	3.69783	2.02311	0.0438873	0.34296	-3.94305
hsa-miR-3184-5p	-0.292672	8.45268	-3.1733	0.00165252	0.111047	-1.27968
hsa-miR-4792	-0.296416	6.47564	-2.59007	0.0100314	0.200706	-2.77104
hsa-miR-4446-5p	-0.332031	2.39979	-2.06331	0.0398844	0.34296	-3.86914
hsa-miR-596	-0.340357	2.26345	-2.00183	0.0461412	0.34296	-3.9816
hsa-miR-509-3p	-0.345764	2.11466	-2.02244	0.0439566	0.34296	-3.94426
hsa-miR-3657	-0.349514	2.03781	-1.98651	0.0478237	0.34296	-4.00911
hsa-miR-6071	-0.352102	2.70246	-2.42971	0.015657	0.236669	-3.13067
hsa-miR-3164	-0.355123	2.04241	-1.99349	0.0470512	0.34296	-3.99661
hsa-miR-4793-5p	-0.3584	2.03384	-2.06454	0.0397665	0.34296	-3.86685
hsa-miR-143-3p	-0.365395	2.03818	-1.99652	0.0467186	0.34296	-3.99116
hsa-miR-566	-0.366774	2.69914	-2.41938	0.0161003	0.236669	-3.15307
hsa-miR-380-5p	-0.373413	2.0677	-2.10427	0.0361295	0.34296	-3.79237
hsa-miR-4519	-0.376002	2.42559	-2.06826	0.039413	0.34296	-3.85993
hsa-miR-28-5p	-0.376229	2.20136	-2.0001	0.0463285	0.34296	-3.98472
hsa-miR-933	-0.381715	3.42386	-2.06527	0.0396971	0.34296	-3.8655
hsa-miR-126-5p	-0.388668	2.03724	-2.0674	0.0394942	0.34296	-3.86153
hsa-miR-504-5p	-0.391145	2.13491	-2.01897	0.0443184	0.34296	-3.95058
hsa-miR-33b-5p	-0.391727	2.03033	-2.00546	0.0457498	0.34296	-3.97505
hsa-miR-548az-3p	-0.393019	2.05924	-1.98792	0.0476664	0.34296	-4.00658
hsa-miR-520a-5p	-0.394947	2.09018	-2.0011	0.0462205	0.34296	-3.98292
hsa-miR-433-3p	-0.401125	2.2624	-2.06405	0.0398133	0.34296	-3.86776
hsa-let-7i-3p	-0.403316	2.07514	-2.06935	0.0393099	0.34296	-3.8579
hsa-miR-33b-3p	-0.405993	2.44714	-2.30384	0.0218677	0.285991	-3.39747
hsa-miR-571	-0.406028	2.03709	-2.11053	0.0355834	0.34296	-3.78052
hsa-miR-586	-0.410716	2.05288	-2.02748	0.0434359	0.34296	-3.93508
hsa-miR-6864-5p	-0.414309	2.10023	-2.42465	0.015873	0.236669	-3.14166
hsa-miR-496	-0.421799	2.06626	-2.14724	0.0325204	0.34296	-3.71028
hsa-miR-33a-5p	-0.423766	2.10085	-2.16653	0.0310035	0.34296	-3.67289
hsa-miR-145-5p	-0.427154	2.50007	-2.13627	0.0334106	0.34296	-3.73138
hsa-miR-4485-3p	-0.429307	2.41411	-2.03017	0.0431609	0.34296	-3.93018
hsa-miR-1251-5p	-0.436877	2.07699	-2.12979	0.0339469	0.34296	-3.74381
hsa-miR-556-3p	-0.43744	2.05777	-2.16613	0.0310341	0.34296	-3.67366
hsa-miR-6864-3p	-0.453553	2.25547	-2.36138	0.0188021	0.262285	-3.2772
hsa-miR-196a-5p	-0.456073	2.16058	-2.53845	0.0116049	0.213813	-2.88921
hsa-miR-4295	-0.457226	2.0995	-2.35184	0.0192824	0.265496	-3.29733
hsa-miR-323a-3p	-0.461119	2.16679	-2.21407	0.0275235	0.326331	-3.57937
hsa-miR-4795-3p	-0.477656	2.12827	-2.43479	0.015443	0.236669	-3.11962
hsa-miR-6869-3p	-0.486034	2.34892	-2.20669	0.0280407	0.330932	-3.59403
hsa-miR-99a-5p	-0.491377	2.21785	-2.30136	0.0220089	0.285991	-3.40258
hsa-miR-548s	-0.500955	2.38089	-2.07899	0.0384088	0.34296	-3.83992
hsa-miR-4652-5p	-0.508845	2.51951	-2.42723	0.0157623	0.236669	-3.13605
hsa-miR-195-3p	-0.515366	2.61768	-2.4879	0.0133551	0.230637	-3.00271
hsa-miR-516a-5p	-0.589493	2.44698	-2.62659	0.00903672	0.189768	-2.68608
hsa-miR-6070	-0.591037	2.33613	-2.77799	0.0057902	0.171342	-2.32172
hsa-miR-4633-3p	-0.632367	2.8809	-2.29727	0.022244	0.285991	-3.41101
hsa-miR-4663	-0.672789	2.83382	-3.10904	0.00204441	0.115874	-1.45791

## Sheet: Table S10
Table S10 MCI功能模块pivot(miRNA)-Module 互作对
blue	hsa-miR-106a-5p	miRNA	0.00288417	7
blue	hsa-miR-20a-5p	miRNA	0.000635075	6
blue	hsa-miR-17-5p	miRNA	0.000896546	6
blue	hsa-miR-20b-5p	miRNA	0.000240979	5
blue	hsa-miR-186-5p	miRNA	0.0134973	5
blue	hsa-miR-519d-3p	miRNA	0.000362957	4
blue	hsa-miR-130a-3p	miRNA	0.000671473	4
blue	hsa-miR-302e	miRNA	0.0140228	4
blue	hsa-miR-374b-5p	miRNA	0.0224253	4
blue	hsa-miR-181a-5p	miRNA	0.0274052	4
blue	hsa-miR-520a-3p	miRNA	0.0309308	4
blue	hsa-miR-103a-3p	miRNA	0.00114754	3
blue	hsa-miR-107	miRNA	0.00120792	3
blue	hsa-miR-373-3p	miRNA	0.00232197	3
blue	hsa-miR-520d-3p	miRNA	0.00425981	3
blue	hsa-miR-181b-5p	miRNA	0.00439026	3
blue	hsa-miR-372-3p	miRNA	0.00490292	3
blue	hsa-miR-520e	miRNA	0.00495233	3
blue	hsa-miR-520c-3p	miRNA	0.00558462	3
blue	hsa-miR-520b	miRNA	0.00873731	3
blue	hsa-miR-448	miRNA	0.0165144	3
blue	hsa-miR-128-3p	miRNA	0.0337948	3
blue	hsa-miR-124-3p	miRNA	0.0360866	3
blue	hsa-miR-424-5p	miRNA	1.16838e-05	2
blue	hsa-miR-16-5p	miRNA	1.63571e-05	2
blue	hsa-miR-19a-3p	miRNA	1.93563e-05	2
blue	hsa-miR-19b-3p	miRNA	2.16564e-05	2
blue	hsa-miR-29b-3p	miRNA	0.00401245	2
blue	hsa-miR-29c-3p	miRNA	0.00792378	2
blue	hsa-miR-506-3p	miRNA	0.0139262	2
blue	hsa-miR-34a-5p	miRNA	0.0143834	2
blue	hsa-miR-34c-5p	miRNA	0.0178268	2
blue	hsa-miR-137	miRNA	0.0266996	2
blue	hsa-miR-200b-3p	miRNA	0.040587	2

[truncated: 2 more sheets: Table S11, Table S12]
